# Supplementary material for: Differential Expression Analysis of a Subset of Drought-Responsive GmNAC Genes in Two Soybean Cultivars Differing in Drought Tolerance
Source: MDPI journal article supplement (doi:10.3390/ijms141223828), 2013-12-06
Supplement: s2 [file s2]

## Sheet: Table S2
Table S2. cis-regulatory motifs found in the promoter region (3000 bp upstream from transcription start site of each gene) of the candidate GmNAC genes.
Gene name	Gene ID	Direction	UPS length (bp)	cis -motifs
				ABRE1 1 (T/CACGTGGC)	ABRE2 1 (ACGTGG/TC)	CE1 1 (TGCCACCGG)	CE3 5 (CACGCG)	CRT 1 (GGCCGACAT)	DRE 2,5 (A/GCCGAC)	ICEr1 1 (GGACACATGTCAGA)	ICEr2 1 (ACTCCG)	LTRE 1 (GGCCGACGT)	MYBR 1,2,3 (TGGTTAG) (C/TAACG/TG)	MYCR 1 (CACATG)	NACR 1 (ACACGCATGT)	ZFHDRS 6 (CACTAAATTGTCAC)	G-BOX 4 (CACGTG)	T/G BOX 5 (CACGTT)	EE 5 (AATATC)
GmNAC011	Glyma02g26480.1	Reverse	3000	None	−89 to −83	None	−1851 to −1846	None	−194 to −189	None	None	None	−1892 to −1887	None	None	None	None	None	−2183 to −2178; −2103 to −2098
GmNAC085	Glyma12g22880.1	Reverse	3000	None	−1340 to −1334; −106 to −100	None	None	None	None	None	None	None	−796 to −791	None	None	None	−1341 to −1336; −927 to −922; −897 to −892	–2986 to –2981; –2876 to –2871; –1052 to –1047; –757 to –752	−700 to −695
GmNAC092	Glyma12g35000.1	Reverse	3000	None	−2652 to −2646; −1026 to −1020	None	−350 to −345	None	−1202 to −1197	None	None	None	−1358 to −1353	−1860 to −1855; −1260 to −1255	None	None	−1252 to −1247; −1242 to 1237; −1027 to 1022; −676 to −671; −130 to −125	–1818 to –1813	−2907 to −2902; −459 to −454
GmNAC095	Glyma13g05540.1	Forward	3000	None	None	None	None	None	None	None	None	None	None	None	None	None	−890 to −885	None	−2407 to −2402; −2173 to −2168; −1915 to −1910
GmNAC101	Glyma13g35550.1	Forward	3000	None	−2116 to −2110; −1360 to −1354	None	None	None	−1197 to −1192	None	None	None	−388 to −383	−1017 to −1012; −377 to −372	None	None	−2823 to −2818; −1361 to −1356; −1255 to −1250; −1247 to −1242; −1237 to −1232; −659 to −654; −128 to −123	–1830 to –1825	−2993 to −2988; −2413 to −2408; −2346 to −2341; −1687 to −1682
GmNAC109	Glyma14g24220.1	Reverse	3000	None	−101 to −95	None	None	None	−206 to −201	None	–109 to –104	None	−603 to −598; −2391 to −2386	−562 to −557	None	None	−1180 to −1175; −102 to −97	None	−2371 to −2366; −2351 to −2346
cis motifs1 according to Yamaguchi-Shinozaki et al. [51].
cis motifs2 according to Ramya et al. [53].
cis motif3 according to Abe et al. [8].
cis motif4 according to Behnam et al. [52].
cis motifs5 according to Maruyama et al. [54].
cis motif6 according to Tran et al. [55].
GmNAC gene ID and UPS sequence (upstream promoter sequence - 3000-bp - back from transcription start site) were assessed using the SoybeanTFDB (soybeantfdb.psc.riken.jp) database.
